1 **Spinal cholinergic interneurons differentially control motoneuron excitability and alter**  
2 **the locomotor network operational range**

3

4

5

6 Maria Bertuzzi and Konstantinos Ampatzis

7

8

9 Department of Neuroscience, Karolinska Institutet, 171 77 Stockholm, Sweden

10

11

12

13

14

15

16

17

18

19 **Corresponding author:** Konstantinos Ampatzis, Department of Neuroscience, Karolinska

20 Institutet, SE-171 77 Stockholm, Sweden.

21 Tel: +46 8 524 87399, Fax: +46 8 349544, E-mail: [Konstantinos.Ampatzis@ki.se](mailto:Konstantinos.Ampatzis@ki.se)

22 **Summary**

23

24 While cholinergic neuromodulation is important for locomotor circuit operation, the specific  
25 neuronal mechanisms that acetylcholine employs to regulate and fine-tune the speed of  
26 locomotion are largely unknown. Here, we show that cholinergic interneurons are present in  
27 the zebrafish spinal cord and differentially control the excitability of distinct classes of  
28 motoneurons (slow, intermediate and fast) in a muscarinic dependent manner. Moreover, we  
29 reveal that m2-type muscarinic acetylcholine receptors (mAChRs) are present in fast and  
30 intermediate motoneurons, but not in the slow motoneurons, and that their activation decreases  
31 neuronal firing. We also provide evidence that this configuration of motoneuron muscarinic  
32 receptors serves as the main intrinsic plasticity mechanism to alter the operational range of  
33 motoneuron modules. These unexpected findings provide new insights into the functional  
34 flexibility of motoneurons and how they execute locomotion at different speeds.

## 35 **Introduction**

36 Neural networks in the spinal cord are responsible for the generation and execution of  
37 movements (Goulding, 2009; Grillner, 2003; Grillner and Jessell, 2009; Kiehn, 2006). These  
38 spinal cord networks are organized in distinct functional microcircuit modules (Ampatzis et al.,  
39 2014; Bagnall and McLean, 2014) with defined operational ranges, whose sequential activation  
40 increases the speed of locomotion (Ampatzis et al., 2014). The activity of the spinal neuronal  
41 microcircuits is regulated by a range of neuromodulatory systems (Miles and Sillar, 2011) that  
42 permit motoneurons to adjust their final motor output. One such prominent neuromodulatory  
43 system is the cholinergic system (Miles et al., 2007; Zagoraiou et al., 2009). In rodents,  
44 cholinergic neuromodulation increases motoneuron excitability (Miles et al., 2007; Deardorff  
45 et al., 2014) in a task-dependent manner (Zagoraiou et al., 2009), which is exclusively mediated  
46 by cholinergic V0c interneurons (Zagoraiou et al., 2009). Whether cholinergic interneurons are  
47 present in the zebrafish spinal cord, and how they regulate the activity of the distinct  
48 motoneuron modules (slow, intermediate and fast) during locomotion is, however, unknown.

49 In mammals, acetylcholine release increases motoneuron excitability (Chevallier et al., 2006;  
50 Hornby et al., 2002; Ireland et al., 2012; Miles et al., 2007). Although m2 type metabotropic  
51 muscarinic acetylcholine receptor (m2-mAChR) activation is reported to mediate mammalian  
52 motoneuron hyperexcitability (Deardorff et al., 2014; Miles et al., 2007; Zagoraiou et al., 2009),  
53 numerous studies also demonstrate m2-mAChR-mediated inhibitory actions, in several  
54 neuronal populations (Brown, 2010; Felder, 1995; Hosey, 1992), including motoneurons  
55 (Kurihara et al., 1993). Moreover, m2-mAChRs are found to be predominantly expressed in  
56 large motoneurons (Welton et al., 1999). This suggests that only a subset of motoneurons are  
57 sensitive to cholinergic modulation via the m2-mAChRs. In order to resolve the question of  
58 whether m2 receptors are present in all motoneuron pools (slow, intermediate and fast), and

59 determine how activation of the m2-mAChRs influences the motoneuron functionality, we used  
60 the accessible neuro-muscular configuration of the adult zebrafish (Ampatzis et al., 2013).

61 Using a combination of anatomical, electrophysiological, pharmacological, *ex vivo* and *in vivo*  
62 behavioral approaches in adult zebrafish, we uncover a previously unidentified population of  
63 spinal cord cholinergic interneurons that is analogous to mammalian V0c interneurons.  
64 Furthermore, we provide the first functional evidence that cholinergic modulation acts as a  
65 plasticity mechanism to differentially regulate the excitability and operational range of separate  
66 motoneuron modules through activation of distinct mAChR subtypes.

## 67 **Results**

### 68 **Zebrafish spinal cholinergic system organization**

69 We first examined the distribution pattern of cholinergic terminals (VChT<sup>+</sup>) in the adult  
70 zebrafish spinal cord. Multiple cholinergic terminals were detected in the dorsal horn, neuropil  
71 and motor column (Figure 1A). Using the accessible neuro-muscular configuration of the adult  
72 zebrafish, we dissected distinct functional motoneuron pools (Ampatzis et al., 2013). All  
73 retrogradely traced secondary motoneuron types (slow, intermediate and fast) received  
74 abundant cholinergic innervation (Figure 1B). To determine whether this innervation differs  
75 among functionally different pools of secondary motoneurons, we analyzed the number of  
76 cholinergic terminals (VChT<sup>+</sup>) in close proximity to motoneuron cell bodies (see Materials  
77 and Methods). Fast motoneurons receive a significantly higher number of putative cholinergic  
78 inputs than the intermediate and slow motoneurons (One-way ANOVA,  $F_{2,64} = 16.69$ ,  $p <$   
79  $0.0001$ ,  $n = 67$  neurons; Figure 1C). Furthermore, our analysis showed that these cholinergic  
80 synapses on motoneurons do not display the typical morphology of the mammalian “c-boutons”  
81 (Zagoraïou et al., 2009; Herron and Miles, 2012; Skup et al., 2012; Deardorff et al., 2014). To  
82 investigate the origin of this input, we retrogradely labeled the brain neurons descending to

83 spinal cord (fluorescent Dextran tracer; see Material and Methods) and subsequently  
84 immunolabeled cholinergic neurons (Choline Acetyltransferase (ChAT) immunoreactivity; n =  
85 8 brains). Our analysis revealed that none of these neurons were cholinergic as shown by the  
86 co-localization experiments (Supplementary file 1A-H). Moreover, few retrogradely labeled  
87 neurons in the initial part of the spinal cord were found to be cholinergic (ChAT<sup>+</sup>)  
88 (Supplementary file 1I).

89 Having established that spinal cord cholinergic innervation is not provided by brain descending  
90 neurons, we hypothesized that spinal cord cholinergic interneurons account for the strong  
91 cholinergic input to motoneurons. This hypothesis is supported by the morphology of zebrafish  
92 motoneurons, which lack axonal collaterals (Ampatzis et al., 2013), that are recurrent axons  
93 that branch off from the main axon. In mammals, motoneuron collaterals form synaptic contacts  
94 with the Renshaw cells and other motoneurons (Eccles et al., 1954; Cullheim et al., 1977).  
95 Renshaw cells have not been reported in the zebrafish spinal circuits, and zebrafish  
96 motoneuron-motoneuron communication is mediated through dendro-dendritic electrical gap  
97 junctions (Song et al., 2016). We tested our hypothesis using two complementary approaches.  
98 First, we employed the *Islet1:GFP* zebrafish line, in which all motoneurons express green  
99 fluorescent protein (GFP; Uemura et al., 2005) and labeled both motoneurons and cholinergic  
100 interneurons through ChAT immunoreactivity (Figure 1D). We identified a significant fraction  
101 ( $38.17 \pm 2.523\%$ , Figure 1E), of small to medium size non-motoneuron cholinergic neurons  
102 (ChAT<sup>+</sup>Islet1<sup>-</sup>,  $40.13 \pm 1.038 \mu\text{m}^2$ ; Figure 1F), which were distributed throughout the motor  
103 column (Figure 1G). In comparison, identified motoneurons were larger (ChAT<sup>+</sup>Islet1<sup>+</sup>,  $69.04$   
104  $\pm 4.729 \mu\text{m}^2$ ; Figure 1F). To further confirm that all the ChAT<sup>+</sup>Islet1<sup>-</sup> are indeed interneurons  
105 and not motoneurons which had lost the GFP expression in the *Islet1* line, we injected a  
106 retrograde tracer into zebrafish spinal cord ventral roots (see Material and Methods; Figure 1H)  
107 and combined it with ChAT immunoreactivity (Figure 1I). Given that all zebrafish motoneuron

108 axons exiting from the same ventral root correspond to the spinal hemisegment, this approach  
109 enabled us to reveal all the spinal motoneurons (axial and fin; Figure 1H). We observed that  
110  $37.37 \pm 3.75\%$  (Figure 1J) of the cholinergic neurons are not motoneurons, similar to findings  
111 in the *Islet1* zebrafish transgenic line.

112 Finally, to assess whether spinal cholinergic interneurons innervate targets located in rostral or  
113 caudal spinal cord segments, we identified cholinergic interneurons (into segment 15) as  
114 ascending or descending, after injection of a retrograde tracer (dextran) into segments 12 or 18,  
115 respectively, in an *Islet1:GFP* line (n=14 zebrafish; Figure 1J,K). 24h after the tracer injection  
116 we processed the tissue for ChAT immunostaining. We observed that 7.56% of ChAT<sup>+</sup>Islet1<sup>-</sup>  
117 neurons were labelled as descending neurons (Supplementary file 1J, L, M), and 13.22% of  
118 ChAT<sup>+</sup>Islet1<sup>-</sup> neurons were determined as ascending neurons (Supplementary file 1K-M),  
119 indicating that 20.78% of the cholinergic interneurons project to other spinal cord segments.  
120 The significant difference between the soma size of the ascending and descending cholinergic  
121 interneurons suggest that they form two non-overlapping neuronal subpopulations  
122 (Supplementary file 1N). Overall, our data suggest that zebrafish spinal motoneurons receive  
123 unevenly distributed cholinergic input from a local spinal source, represented by cholinergic  
124 interneurons.

## 125 **V0c interneurons are present in zebrafish spinal cord**

126 Most (~75%) ChAT interneurons (ChAT<sup>+</sup>Islet1<sup>-</sup>) were found in the dorsal part of the motor  
127 column close to the central canal (Figure 1G), where the mammalian V0c interneurons are also  
128 positioned (Zagoraïou et al., 2009). Previously, it was assumed that V0c interneurons do not  
129 exist in zebrafish (Satou et al., 2012). To test if the observed zebrafish spinal cholinergic  
130 interneurons correspond to the mammalian V0c interneurons, we combined *in situ*  
131 hybridization for *Pitx2*, a paired-like homeodomain transcription factor that marks V0c

132 interneurons in mammals (Figure 2A; Zagoraïou et al. 2009), with ChAT immunolabeling  
133 (Figure 2B). Our analysis revealed that  $28.36 \pm 1.83$  % of the ChAT neurons were also *Pitx2*  
134 positive (*Pitx2*<sup>+</sup>; Figure 2C). Although the *Pitx2*<sup>+</sup> neurons were distributed throughout the  
135 motor column, ~80% were located around the central canal (Figure 2D), suggesting that an  
136 equivalent of mammalian V0c interneurons do exist in zebrafish. Moreover, we performed  
137 whole cell patch clamp recordings from several unidentified neurons located around the central  
138 canal. We found that 3 neurons out of 20 were cholinergic and not motoneurons, and they  
139 displayed intrinsic electrical properties (i.e. prominent after-hyperpolarization, rheobase, lack  
140 of neuronal sag) comparable to the mammalian V0c interneurons (Zagoraïou et al. 2009; Figure  
141 2E). Although these interneurons do not receive rhythmic synaptic inputs during locomotion,  
142 they receive strong synaptic potentials at speeds < 6 Hz (paired t test,  $t = 5.133$   $df = 40$ ,  $p <$   
143  $0.0001$ ,  $n = 3$  neurons; Figure 2F).

144 It was apparent that the cholinergic interneurons are not active during regular swimming (<  
145 6Hz), so we next assessed when these cholinergic interneurons operate, contributing to  
146 locomotor network functionality. To address this issue, we subjected adult zebrafish to forced  
147 fast swimming test (80% of the critical speed ( $U_{crit}$ ), see Material and Methods) for 2 h,  
148 followed by functional anatomical analysis of *c-fos* expression as an index of neuronal activity.  
149 Analysis of *c-fos* intensity in all ChAT<sup>+</sup>Islet1<sup>-</sup> neurons revealed that more neurons are active  
150 (54%) during fast swimming, compared to the control, as indicated by a significant increase in  
151 *c-fos* expression (unpaired t test,  $t = 2.89$   $df = 60$ ,  $p = 0.0054$ ; Figure 2G-J). Our observations  
152 are in agreement with previous analysis performed in the cat spinal cord, which showed that  
153 cholinergic neurons close to the central canal were functionally active during prolonged fictive  
154 locomotion (Huang et al., 2000). Collectively, our results demonstrate that the vast majority of  
155 the zebrafish cholinergic interneurons (80%) are analogues to mammalian V0c interneurons  
156 and their activity is related to prolonged fast locomotion.

## 157 **Muscarinic receptors differentially alter motoneuron excitability**

158 In mammals, acetylcholine increases the excitability of spinal motoneurons through the  
159 activation of muscarinic receptors (Miles et al., 2007). To investigate whether zebrafish  
160 motoneuron excitability is responsive to activation of mAChRs we obtained whole cell current  
161 clamp recordings from different classes (slow, intermediate and fast) of axial secondary  
162 motoneurons. Since the fast and intermediate motoneurons discharge single action potentials  
163 (APs), whereas slow motoneurons fire in bursts of APs (Gabriel et al., 2011; Ampatzis et al.,  
164 2013), the excitability of motoneurons was assessed by examining their response (number of  
165 single APs or number of bursts) to steps of supra-threshold depolarizing current pulses (500  
166 ms, increments of 10% from rheobase), before and after the application of muscarine, a non-  
167 selective mAChR agonist. In the presence of muscarine (15  $\mu$ M), the firing rate of both slow  
168 (one-way ANOVA repeated measures,  $F_{1,319,5.277} = 16$ ,  $p = 0.021$ ,  $n = 5$  out of 5) and intermediate  
169 (one-way ANOVA repeated measures,  $F_{1,269,6.344} = 24.36$ ,  $p = 0.0079$ ,  $n = 6$  out of 6 neurons)  
170 motoneurons substantially increased (Figure 3A-C, F). This was accompanied by an increase  
171 of the input resistance (slow MNs: one-way ANOVA repeated measures,  $F_{1,059,4.237} = 13.34$ ,  $p =$   
172  $0.0227$ ; intermediate MNs: one-way ANOVA repeated measures,  $F_{1,493,7.466} = 12.64$ ,  $p = 0.0258$ ;  
173 Figure 3E) and changes in other intrinsic biophysical properties (Supplementary file 2), without  
174 significantly altering the resting membrane potential (Figure 3D). In contrast, the fast  
175 motoneurons showed a decrease in excitability, resulting in fewer action potentials (one-way  
176 ANOVA repeated measures,  $F_{1,986,15.89} = 38.05$ ,  $p < 0.0001$ ,  $n = 9$  out of 9 neurons; Figure  
177 3A,B,F) associated with a significant decrease of the input resistance (one-way ANOVA  
178 repeated measures,  $F_{1,12,8.958} = 4.462$ ,  $p = 0.0141$ , Figure 3E). Moreover, alterations of the  
179 electrical properties of fast motoneurons were similar to those observed in the intermediate  
180 motoneurons (Supplementary file 2). The observed changes in intrinsic biophysical properties  
181 of the motoneurons are consistent with previously reported alterations of mammalian



182 motoneurons in response to muscarine (Ireland et al., 2012).

183

### 184 **Motoneurons possess different muscarinic receptor subtypes**

185 We speculated that the differential motoneuron excitability we observed might arise from the  
186 presence of different mAChR subtypes in the motoneurons. To test if m2-mAChRs alone  
187 mediate the changes in motoneuron excitability, we applied a mixture of muscarine (15  $\mu$ M)  
188 and methoctramine (10  $\mu$ M), a selective m2-mAChR antagonist (Hulme et al., 1990). We  
189 recorded an increase in excitability of fast (paired t test,  $t = 3.641$ ,  $p = 0.0219$ ,  $n = 5$  out of 5  
190 neurons; Figure 4A-C), intermediate (paired t test,  $t = 4.323$ ,  $p = 0.0228$ ,  $n = 4$  out of 4 neurons)  
191 and slow (paired t test,  $t = 4.00$ ,  $p = 0.0161$ ,  $n = 3$  out of 3 neurons) motoneurons (Figure 4A-  
192 C). To assess whether m2-mAChRs are present in all classes of motoneurons, we applied  
193 oxotremorine-M (Oxo-M; 20  $\mu$ M), an m2-mAChR preferential agonist (Murakami et al., 1996).  
194 In response, the fast (paired t test,  $t = 10.00$ ,  $p = 0.0005$ ,  $n = 5$  out of 5 neurons) and intermediate  
195 (paired t test,  $t = 6.668$ ,  $p = 0.0026$ ,  $n = 5$  out of 5 neurons) motoneurons exhibited reduced  
196 firing (Figure 4D-F), whereas, slow motoneuron firing was unaffected (paired t test,  $t = 1.00$ ,  $p$   
197  $= 0.391$ ,  $n = 4$  out of 4 neurons; Figure 4D-F), suggesting that they do not express the m2-  
198 mAChR subtype. Moreover, we confirmed the presence of m2-mAChRs in motoneurons  
199 anatomically. Immunoreactivity for the m2-mAChRs was strong in fast motoneurons and  
200 modest in intermediate motoneurons (One-way ANOVA,  $F_{2,35} = 51.32$ ,  $p < 0.0001$ ,  $n = 38$   
201 neurons; Figure 4G, H). In contrast, slow motoneurons were weakly labeled for the m2-  
202 mAChR, supporting previous reports (Welton et al., 1999; Figure 4G, H). These results indicate  
203 that multiple mAChR subtypes are expressed in a motoneuron type-dependent manner, which  
204 functions to differentially mediate the actions of acetylcholine.

205

### 206 **Activation of motoneuron muscarinic receptors controls fast locomotion**

207 Given that motoneuron excitability can retrogradely influence the upstream locomotor network  
208 function (presynaptic release, generation of action potentials, swimming duration and  
209 frequency) through gap junctions (Song et al., 2016), we tested the functional significance of  
210 motoneuron mAChR activation during locomotion. For this, we used the adult zebrafish *ex vivo*  
211 preparation (Ampatzis et al., 2013; Ampatzis et al., 2014; Gabriel et al., 2011; Song et al.,  
212 2016). Bath application of muscarine facilitated fictive locomotor activity and increased the  
213 highest reached swimming frequency by  $26.8 \pm 5.8 \%$  (paired t test,  $t = 6.675$ ,  $p < 0.0001$ ,  $n =$   
214  $12$ ; Figure 5A-B). It should be noted that the amplitude of the swimming membrane potential  
215 oscillations during locomotion is related to swimming frequency (Gabriel et al., 2011). In the  
216 presence of muscarine, the correlation between oscillation amplitude and frequency was  
217 decreased in the fast motoneurons (Figure 5C) and enhanced in the intermediate motoneurons  
218 that were recruited above 7 Hz (Figure 5D). Furthermore, we investigated the number of APs  
219 in the slow and intermediate motoneurons during ongoing fictive locomotion at 5 Hz (Figure  
220 5E). At this swimming speed, we found that only the intermediate motoneurons discharge more  
221 action potentials in the presence of muscarine, compared to controls (paired t test,  $t = 3.43$ ,  $p =$   
222  $0.0018$ ; Figure 5E). Overall, our findings demonstrate that activation of spinal muscarinic  
223 receptors facilitates the recruitment of the intermediate motoneuron-interneuron module while  
224 hindering the recruitment of the fast locomotor module, as seen through the motoneuron  
225 activation.

226 Finally, we sought to better understand the *in vivo* behavioral functions of the activation of  
227 mAChRs. Therefore, we subjected zebrafish to a critical speed test (Supplementary file 3; see  
228 Supplemental Experimental Procedures). Critical speed ( $U_{crit}$ ) is a measure of the highest  
229 sustainable swimming speed that a fish can reach (Brett, 1964). Intraperitoneal administration  
230 of muscarine ( $50 \mu\text{M}$ ,  $525 \text{ ng/g BW}$ ; Supplementary file 3A) significantly reduced the highest  
231 sustainable swimming speed (unpaired t test,  $t = 2.65$ ,  $p = 0.014$ ,  $n = 23$  zebrafish; Figure 5F).

232 In contrast, methoctramine treated animals (40  $\mu$ M, 2.2mg/g BW; Supplementary file 3)  
233 increased the uppermost locomotor speed (unpaired t test,  $t = 2.12$ ,  $p = 0.047$ ,  $n = 20$  zebrafish;  
234 Figure 5G). Similarly, exogenous activation of all muscarinic receptors except the m2-  
235 mAChRs, achieved by co-administration of muscarine (50  $\mu$ M) and methoctramine (40  $\mu$ M),  
236 increased the maximum locomotor speed obtained (unpaired t test,  $t = 2.156$ ,  $p = 0.046$ ,  $n = 18$   
237 zebrafish; Figure 5H).

238 To test the effect of our pharmacological treatments on locomotion under normal conditions,  
239 animals were subjected to an open field test (Supplementary file 3, see Material and Methods).  
240 We observed that similar treatment did not affect the regular locomotor behavior (distance  
241 traveled, average velocity and maximum velocity; Figure 5I-K), suggesting that the differences  
242 in critical speed observed here are due to the effect on the spinal locomotor circuit. These data  
243 show that stimulation of m2-mAChRs causes a reduction in the maximum swimming speed to  
244  $76.5 \pm 6.7 \%$  of the of the  $U_{crit}$ , corresponding to the zebrafish optimum speed (Palstra et al.,  
245 2010), where swimming relies only on the activity of the slow and intermediate neuro-muscular  
246 system, and not on the fast. Our analysis cannot rule out the possibility of an additional direct  
247 effect of mAChR activation in the premotor neurons, however, as any alteration in motoneuron  
248 excitability will retrogradely affect the excitability and pre-synaptic release of glutamate from  
249 V2a interneurons (Song et al., 2016), which will influence premotor network functionality.  
250 Taken together, our results suggest that cholinergic modulation acts both on motoneurons and  
251 the premotor network to modify the speed of locomotion mainly through the engagement of the  
252 fast motoneuron-interneuron module.

## 253 **Discussion**

254 Our findings suggest that motoneurons receive cholinergic input exclusively from spinal  
255 interneurons, with the vast majority of them being analogous to mammalian V0c interneurons.

256 Acetylcholine shifts motoneuron excitability through the parallel activation of different  
257 mAChRs subtypes (Figure 6A). Moreover, activation of this pathway selectively alters the  
258 operational range of different motoneuron modules during locomotion (Figure 6B). Overall,  
259 this work provides novel insights into how intraspinal acetylcholine release can modify the  
260 functionality of the spinal circuitry, which requires synaptic specificity and temporal precision  
261 to generate locomotion at different speeds (Ampatzis et al., 2013; Ampatzis et al., 2014).

262  
263 One of our major findings is establishing the existence of cholinergic interneurons in the  
264 zebrafish spinal cord and identifying them as the exclusive source of the cholinergic spinal  
265 input. Although earlier studies showed the existence of cholinergic interneurons in several  
266 vertebrate species (Thiriet et al., 1992; Anadón et al., 2000; González et al., 2002; Miles et al.,  
267 2007; Quinlan and Buchanan, 2008; Zagoraiou et al., 2009), and moreover, the zebrafish  
268 cholinergic system is well characterized (Clemente et al., 2004; Mueller et al., 2004), the  
269 presence of zebrafish spinal cord cholinergic interneurons has not been previously reported.  
270 While a number of Chat<sup>+</sup>Islet1<sup>-</sup> neurons were identified earlier (Stil and Drapeau, 2016), it has  
271 been proposed that these small cholinergic neurons correspond to motoneurons, rather than the  
272 ones that innervate the axial muscles (Muller et al., 2004). Previous attempts to localize *Pitx2*  
273 expression with *Dbx1* in order to reveal the existence of V0c interneurons in zebrafish spinal  
274 cord were ineffective (Satou et al., 2012). In the current study we used a different approach, by  
275 combining *Pitx2* expression with ChAT immunostaining, to achieve this goal. We revealed that  
276 most cholinergic interneurons share comparable anatomical distribution, molecular identity and  
277 electrical properties with mammalian V0c interneurons. Our analysis cannot rule out the  
278 possibility that more cholinergic interneuron subtypes are present in zebrafish spinal cord.  
279 However, most of zebrafish cholinergic interneurons (~80%) express *Pitx2*, thus we considered  
280 them to be similar to mammalian V0c interneurons. Since V0c interneurons have been shown

281 to be the exclusive source of cholinergic c-bouton input to mammalian motoneurons (Zagoraïou  
282 et al. 2009), our data directly implicate the activity of these cholinergic interneurons in the  
283 cholinergic modulation of motoneurons in the zebrafish.

284 The overall activation of the muscarinic receptors has been shown to increase motoneuron  
285 excitability (Alaburda et al., 2002; Chevallier et al., 2006; Hornby et al., 2002; Ireland et al.,  
286 2012; Miles et al., 2007) via activation of the m2-mAChR subtype (Miles et al., 2007). On the  
287 other hand, numerous studies have shown that activity of the m2-mAChRs is associated with  
288 inhibitory actions in the nervous system (Brown, 2010; Felder, 1995; Hosey, 1992; Kurihara et  
289 al., 1993). Our findings challenge previous conclusions that activation of motoneuron m2-  
290 mAChR is primarily required to increase motoneuron excitability. By pharmacologically  
291 manipulating the m2-mAChRs in different motoneuron pools, we found that m2-mAChR  
292 activation reduces motoneuron excitability and other receptor subtypes can account for the  
293 observed rise in motoneuron firing. In line with this idea, various subtypes of mAChRs have  
294 been characterized in the spinal cord neurons (Brown, 2010; Höglund and Baghdoyan, 1997;  
295 Zhang et al., 2005; Jordan et al., 2014) and it is also well documented that many nerve cells  
296 contain more than one subtype of muscarinic receptor (Finkel et al., 2014; Hassall et al. 1993;  
297 Jordan et al., 2014). The exact muscarinic receptor subtype responsible for the elevated  
298 excitability of adult zebrafish motoneurons remains to be identified. However, it has been  
299 suggested that the excitatory effects of muscarinic agonists on neonatal rat motoneurons are  
300 mediated through the m3-mAChRs (Kurihara et al., 1993). In support of our observations,  
301 Jordan et al. (2014) recently demonstrated that m2-mAChRs and m3-mAChRs are both  
302 involved in the cholinergic modulation of locomotion in mammals. They showed that  
303 application of the m2-mAChR antagonist methoctramine, increased the locomotor rhythm,  
304 whereas application of m3-mAChR antagonist reduced, and finally blocked, the locomotor  
305 activity (Jordan et al., 2014). Our results show that different muscarinic receptor subtypes in

306 the membrane of motoneurons can play a unique role in the regulation of neural activity  
307 involved in the control of locomotion.

308

309 Given the emerging evidence regarding the importance and functional repertoire of spinal  
310 cholinergic input in the control of motor behaviors, it is not surprising that cholinergic synapses  
311 have been implicated in spinal cord injury (Ichiyama et al., 2011; Skup et al., 2012; Jordan et  
312 al., 2014) and motor disease (Herron and Miles, 2012; Pullen and Athanasiou, 2009; Saxena et  
313 al., 2013). However, no causal link has yet been found between alterations in the number and  
314 size of cholinergic synapses, acetylcholine release and muscarinic receptor activation.  
315 Therefore, uncovering the mechanisms by which acetylcholine modifies the activity of spinal  
316 neurons is of significant biological and medical interest. We find that methoctramine treated  
317 animals are able to operate at higher swimming speeds and, in addition, activation of m2-  
318 mAChRs reduces the excitability of the motoneurons, and potentially of other spinal cord  
319 neurons, and their ability to produce the appropriate muscle force. In support of our findings,  
320 Jordan et al., (2014) revealed that application of methoctramine increased the locomotor  
321 frequency in mammals. Moreover, application of cholinergic receptor antagonists following  
322 spinal cord injury was found to advance locomotor activity, suggesting that adaptive alterations  
323 of the spinal cholinergic system obstruct the generation and execution of locomotion (Jordan et  
324 al., 2014). In a mouse model of amyotrophic lateral sclerosis (ALS), methoctramine treatment  
325 counteracts the loss of muscle force during the pre-symptomatic stages of the disease (Saxena  
326 et al., 2013), and is likely to be mediated through the blocking of m2-mAChRs, increasing the  
327 excitability of spinal neurons participating in the generation of movement. In conclusion, our  
328 results provide a novel contribution to existing knowledge, and further understanding of the  
329 causal relationship between activation of muscarinic receptors and locomotion, highlighting  
330 their potential as targets for innovative therapeutic strategies.

331

332 A general question about the cholinergic control of locomotion is made addressable in our  
333 work: how does the muscarinic acetylcholine receptor configuration gate the execution of  
334 locomotor behavior at different speeds? It has been proposed that the cholinergic modulation  
335 of motoneurons is activity dependent (Zagoraïou et al., 2009). In favor of this idea, our work  
336 revealed that pharmacological manipulations of spinal circuit muscarinic receptors *ex vivo* and  
337 *in vivo* only affect the locomotor performance of zebrafish at higher swimming speeds, which  
338 are primarily associated with the engagement and function of the fast motoneuron-interneuron  
339 module. Thus, the mechanisms we identify here suggest an additional level of control during  
340 high-energy-demand locomotion, such as fast swimming.

## 341 **Materials and Methods**

### 342 **Animals**

343 All animals were raised and kept in a core facility at the Karolinska Institute according to  
344 established procedures. Adult zebrafish (*Danio rerio*; 8-10 weeks old; length, 17-19 mm;  
345 weight, 0.025-0.045 g) wild type (AB/Tübingen) and Tg(*Islet1:GFP*) lines were used in this  
346 study. All experimental protocols were approved by the local Animal Research Ethical  
347 Committee, Stockholm and were performed in accordance with EU guidelines.

348

### 349 **Motoneuron and descending/ascending neuron labeling**

350 Zebrafish (n = 30) of either sex were anaesthetized in 0.03% tricaine methane sulfonate (MS-  
351 222, Sigma-Aldrich). Retrograde labeling of axial motoneurons was performed using dye  
352 injections with tetramethylrhodamine-dextran (3000 MW; ThermoFisher, D3307) in specific  
353 muscle fiber types (slow, intermediate or fast). In addition, retrograde labeling of all  
354 motoneurons was performed using similar procedure to spinal cord ventral roots. To label the

355 neurons descending from the brain to the spinal cord the tracer was injected using dye-soaked  
356 pins in the spinal cord at approximately the level of the 6-8th vertebra. Finally, for the  
357 investigation of descending and ascending cholinergic interneurons the tracer was injected in  
358 the spinal segment 18 (n = 7 zebrafish) or 12 (n = 7 zebrafish) respectively. Afterwards all the  
359 animals were kept for at least 24h to allow the retrograde transport of the tracer. We evaluated  
360 the number of ChAT<sup>+</sup>Istlet1<sup>-</sup> interneurons that were positive to the tracer on segment 15 of the  
361 adult zebrafish spinal cord.

362

### 363 **Immunohistochemistry**

364 All animals were deeply anesthetized with 0.1% MS-222. We then dissected the spinal cords  
365 and/or the brains and fixed them in 4% paraformaldehyde (PFA) in phosphate buffer saline  
366 (PBS) (0.01M; pH = 7.4) at 4°C for 2-14h. We performed immunolabelings in both whole  
367 mount and cryosections. For cryosections, the tissues were removed carefully and cryoprotected  
368 overnight in 30% (w/v) sucrose in PBS at 4°C, embedded in OCT Cryomount (Histolab),  
369 rapidly frozen in dry-ice-cooled isopentane (2-methylbutane; Sigma) at approximately -35°C,  
370 and stored at -80°C until use. Transverse coronal plane cryosections (thickness 25 µm) of the  
371 tissue were collected and processed for immunohistochemistry. The tissue was washed three  
372 times for 5 min in PBS. Nonspecific protein binding sites were blocked with 4% normal donkey  
373 serum with 1% bovine serum albumin (BSA; Sigma) and 0.5% Triton X-100 (Sigma) in PBS  
374 for 30 min at room temperature (RT). Primary antibodies were diluted in 1% of blocking  
375 solution and applied for 24-90 hours at 4 °C. For primary antibodies, we used goat anti-ChAT  
376 (1:200; Millipore, AB144P, RRID: AB\_2079751), rabbit anti-GFP (1:700; ThermoFisher  
377 Scientific, A-11122, RRID: AB\_221569), guinea pig anti-VAcHT (1:1000; Millipore, AB1588,  
378 RRID: AB\_11214110), rabbit anti-cfos (1:200; Sigma, F7799) and rabbit anti-m2 mAChRs  
379 (1:700-1:2000; Alomone, AMR-002, RRID: AB\_2039995). After thorough buffer rinses the



380 tissues were then incubated with the appropriate secondary antibodies diluted 1:500 in 0.5%  
381 Triton X-100 (Sigma) in PBS overnight at 4 °C. We used Alexa Fluor–conjugated secondary  
382 antibodies anti-goat 488 (ThermoFisher Scientific, A11055, RRID: AB\_142672), anti-goat 568  
383 (ThermoFisher Scientific, A11057, RRID: AB\_142581), anti-rabbit 488 (ThermoFisher  
384 Scientific, A21206, RRID: AB\_141708) and anti-guinea pig 488 (ThermoFisher Scientific,  
385 A11073, RRID: AB\_142018). Finally, the tissues were thoroughly rinsed in PBS and cover-  
386 slipped with fluorescent hard medium (VectorLabs; H-1400).

387

### 388 **In situ hybridization**

389 Adult zebrafish wild type (AB/Tübingen) spinal cords were fixed, cryoprotected and  
390 cryosectioned (thickness of 12 µm) as described before (see *Immunohistochemistry* section).  
391 Coronal transverse section then processed for fluorescent *in situ* hybridization using the  
392 RNAscope Technology (Advance Cell Diagnostics), according to manufacturer’s instructions.  
393 Target probe for zebrafish specific *Pitx2* gene (Advance Cell Diagnostics, 432161-C3) was  
394 used. After the detection of *Pitx2* mRNA, tissues were processed for ChAT immunodetection  
395 as described before (*Immunohistochemistry section*). To investigate how many of cholinergic  
396 neurons are *Pitx2*, 3 sections per animal (n = 4 zebrafish) corresponding to 12-14th spinal cord  
397 segments were analyzed.

398

### 399 ***c-fos* functional anatomy**

400 Adult zebrafish (*Islet1:GFP*; n = 8) were used for *c-fos* experiments. Animals were subjected  
401 to forced swim test. We used two different experimental protocols to investigate the activity of  
402 cholinergic interneurons. Animals were subjected to prolonged swimming (2 h) at 80% of the  
403 critical speed ( $U_{crit}$ ). Control animals were kept under regular tank swimming conditions.  
404 Immediately after the test all animals were fixed and processed for triple immunolabeling,

405 against *c-fos*, the ChAT and the GFP (see Supplemental Experimental Procedures, section  
406 Immunohistochemistry) in 25  $\mu\text{m}$  thick cryosections. For the *c-fos* experiments, analysis was  
407 performed in neurons (n=62) from sections corresponding to segments 14-17. The intensity of  
408 the *c-fos* activity was evaluated in the obtained confocal pictures using ImageJ.

#### 409 **Microscopy and image analysis**

410 Imaging was carried out in a laser scanning confocal microscope (LSM 510 Meta, Zeiss).  
411 Cholinergic inputs on different motoneuron types were counted on single plan confocal images.  
412 Counting was performed in non-overlapping fields of spinal cord sections, in spinal cord  
413 segments 14-17. We defined the putative cholinergic inputs as number of large ( $>0.5 \mu\text{m}$  of  
414 diameter) VAcHT-positive putatively cholinergic synapses, apposing the somata of  
415 motoneurons. The evaluation included 10 slow, 27 intermediate and 30 fast positive  
416 motoneurons collected from 4 adult zebrafish spinal cords. For the quantification of m2-  
417 mAChRs, all images were captured at identical exposure times in order to ensure the same  
418 illumination level. The intensity of m2-mAChRs immunoreactivity was evaluated in the  
419 obtained confocal pictures using the ImageJ image analysis software. The relative position of  
420 the somata of the neurons within spinal cord, was calculated in whole mount preparations, using  
421 the lateral, dorsal, and ventral edges of spinal cord as well as the central canal as landmarks.  
422 Analysis of all spinal cord neurons was performed between segments 14-17. The relative  
423 position was calculated using ImageJ. Examination of the descending neurons was performed  
424 from a series of coronal brain section, throughout the brain, without discarding any section from  
425 the analysis. The nomenclature used for the brain areas of descending neurons was based on  
426 the topological zebrafish brain atlas (Wullimann et al., 1996). All figures and graphs were  
427 prepared with Adobe Photoshop and Adobe Illustrator (Adobe Systems Inc., San Jose, CA). All  
428 double-labeled images were converted to magenta-green immunofluorescence to make this work  
429 more accessible to the red-green color-blind readers.

### 430 ***Ex vivo* preparation and electrophysiology**

431 The dissection procedure has been described previously (Gabriel et al., 2011; Ampatzis et al.,  
432 2013; Ampatzis et al., 2014; Song et al., 2016). The preparations (n = 47) were then transferred  
433 to a recording chamber, placed lateral side up, and fixed with Vaseline. The chamber was  
434 continuously perfused with extracellular solution contained: 134 mM NaCl, 2.9 mM KCl, 2.1  
435 mM CaCl<sub>2</sub>, 1.2 mM MgCl<sub>2</sub>, 10 mM HEPES, and 10 mM glucose, pH 7.8, adjusted with NaOH,  
436 and an osmolarity of 290 mOsm. All experiments were performed at an ambient temperature  
437 of 20–22°C. For whole-cell intracellular recordings, electrodes (resistance, 9–13 MΩ) were  
438 pulled from borosilicate glass (outer diameter, 1.5 mm; inner diameter, 0.87 mm; Hilgenberg)  
439 on a vertical puller (PC-10 model, Narishige) and filled with intracellular solution containing  
440 the following: 120 mM K-gluconate, 5 mM KCl, 10 mM HEPES, 4 mM Mg<sub>2</sub>ATP, 0.3 mM  
441 Na<sub>4</sub>GTP, 10 mM Na-phosphocreatine, pH 7.4, adjusted with KOH, and osmolarity of 275  
442 mOsm. Dextran-labeled MNs were visualized using a fluorescence microscope (Axioskop FS  
443 Plus, Zeiss) equipped with IR-differential interference contrast optics and a CCD camera with  
444 frame grabber (Hamamatsu) and were then targeted specifically. Intracellular patch-clamp  
445 electrodes were advanced in the exposed portion of the spinal cord through the meninges using  
446 a motorized micromanipulator (Luigs & Neumann) while applying constant positive pressure.  
447 Intracellular signals were amplified with a MultiClamp 700B intracellular amplifier (Molecular  
448 Devices) and low-pass filtered at 10 kHz. In current-clamp recordings, no bias current was  
449 injected. Only motoneurons that had stable membrane potentials at or below –48 mV fired  
450 action potentials to suprathreshold depolarizations and showed minimal changes in series  
451 resistance (<5%) were included in this study. In some experiments neurons were passively filled  
452 with 0.25% neurobiotin tracer (Vector Labs) for post hoc analysis of their neurochemical  
453 identity. Spinal cords with neurobiotin-filled neurons were dissected out and transferred in 4%  
454 PFA solution at 4 °C for 3 h. The tissue was then washed extensively with PBS, and incubated

455 in streptavidin conjugated to Alexa Fluor 555 (1:500; Invitrogen, SP-1120) and were used for  
456 detection of ChAT immunoreactivity following the protocol described above. The following  
457 drugs were added to the physiological solution: non-selective muscarinic receptor agonist  
458 muscarine (15  $\mu$ M; Sigma, M104), m2-type selective muscarinic receptor antagonist  
459 methoctramine (10  $\mu$ M; Sigma, M105) and m2-type preferential muscarinic receptor agonist  
460 oxotremorine-M (20  $\mu$ M; Sigma, O100). All drugs were dissolved as stock solutions in distilled  
461 water. For all the electrophysiological recordings data analysis was performed using Spike2  
462 (version 7, Cambridge Electronic Design) or Clampfit (Molecular Devices) software. The  
463 action potential voltage threshold of motoneurons was determined from the measured  
464 membrane potential at which the  $dV/dt$  exceeded 10 mV/msec.

465

#### 466 ***In vivo* swimming behavior**

467 The swimming ability of zebrafish was tested using the open field test and the critical speed  
468 ( $U_{crit}$ ) test.  $U_{crit}$  is a measure of the highest sustainable swimming speed achievable by a fish.  
469 All zebrafish ( $n = 80$ ) selected for the test displayed similar body length sizes and body weights.  
470 Animals were first anaesthetized in 0.03% tricaine methane sulfonate (MS-222, Sigma-Aldrich)  
471 in fish water and injected intraperitoneally (volume: 2  $\mu$ l) with saline, muscarine (50 $\mu$ M; 525  
472 ng / g body weight) or/and methoctramine (40  $\mu$ M; 2230 ng / g body weight; Figure S3). Treated  
473 animals were placed in the swim tunnel (5 L; Loligo systems, Denmark) to recover and  
474 acclimated at a low water flow speed (4.5 cm/sec) for 7 min. After, fish were given the  $U_{crit}$  test,  
475 subjecting the animals to time intervals of a certain flow velocity (increments of 4.5 cm/sec in  
476 5 min steps) until the fish could not swim against the water current (fatigued; Figure S3).  
477 Fatigue was determined when fish stopped swimming and was forced against the rear net of the  
478 tunnel for more than 5 sec. Critical speed was then calculated using the following equation  
479 (Brett, 1964):

480

$$481 \quad U_{\text{crit}} = U_{\text{fatigue}} + [U_{\text{step}} \times (t_{\text{fatigue}} / t_{\text{step}})],$$

482

483 *Where:*  $U_{\text{fatigue}}$  = the highest flow velocity where fish swam the whole interval,  $U_{\text{step}}$  = velocity  
484 increment,  $t_{\text{fatigue}}$  = time elapsed at final velocity that fish swam in the last interval,  $t_{\text{step}}$  = time  
485 increment that is the duration of one interval. The critical speed was normalized to body length  
486 (BL) of the experimental animals and is given as BL/sec.

487

488 For the open field test, treated animals were placed in small dishes (diameter: 8 cm) and allowed  
489 to swim freely, while their swimming was recorded for 4 min. Analysis of 2 min swimming  
490 behavior was performed after optimization and implementation of wrMTrck, a freely available  
491 ImageJ plugin. The average velocity and maximum velocity was normalized to body length  
492 (BL) of the experimental animals and is given as BL/sec.

493

#### 494 **Statistics**

495 The significance of differences between the means in experimental groups and conditions was  
496 analyzed using the *One-way* ANOVA followed by *post hoc* Tukey test and the two-tailed  
497 Student's *t*-test (paired or unpaired), using Prism (GraphPad Software Inc.) Differences were  
498 considered to be significant if  $p < 0.05$ . Data presented here are given as mean  $\pm$  SEM.

499 **Acknowledgements**

500 We are grateful to A. El Manira for providing the electrophysiology set-up and the zebrafish  
501 lines; and K. Meletis and A. Martin for critical assistance with *in situ* hybridization experiments.  
502 We also thank A. El Manira, C. Broberger, M. Carlén, G. Silberberg, and P. Williams for  
503 valuable discussion and comments of our manuscript. This work was supported by a grant from  
504 the Swedish Research Council (2015-03359 to K.A.), StratNeuro (to K.A.) Swedish Brain  
505 Foundation (FO2016-0007 to K.A.) and Långmanska kulturfonden (BA17-0390 to K.A.).

506 **References**

- 507 Alaburda A, Perrier J-F, Hounsgaard J. 2002. An M-like outward current regulates the  
508 excitability of spinal motoneurons in the adult turtle. *J. Physiol. (Lond.)* **540**:875–881.  
509
- 510 Ampatzis K, Ausborn J, Manira El A. 2013. Pattern of innervation and recruitment of different  
511 classes of motoneurons in adult zebrafish. *J. Neurosci.* **33**: 10875–10886.  
512
- 513 Ampatzis K, Song J, Ausborn J, Manira El A. 2014. Separate microcircuit modules of distinct  
514 v2a interneurons and motoneurons control the speed of locomotion. *Neuron* **83**: 934–943.  
515
- 516 Anadón R, Molist P, Rodríguez-Moldes I, López JM, Quintela I, Cerviño MC, Barja P,  
517 González A. 2000. Distribution of choline acetyltransferase immunoreactivity in the brain of  
518 an elasmobranch, the lesser spotted dogfish (*Scyliorhinus canicula*). *J. Comp. Neurol.* **420**:  
519 139–170.  
520
- 521 Bagnall MW, McLean DL. 2014. Modular organization of axial microcircuits in zebrafish.  
522 *Science* **343**: 197–200.  
523
- 524 Brett JR. 1964. The respiratory metabolism and swimming performance of young sockeye  
525 salmon. *J. Fish Res. Board Can.* **21**: 1183–1226.  
526
- 527 Brown DA. 2010. Muscarinic acetylcholine receptors (mAChRs) in the nervous system: some  
528 functions and mechanisms. *J. Mol. Neurosci.* **41**: 340–346.  
529
- 530 Chevallier S, Nagy F, Cabelguen J-M. 2006. Cholinergic control of excitability of spinal  
531 motoneurons in the salamander. *J. Physiol. (Lond.)* **570**: 525–540.  
532
- 533 Clemente D, Porteros Á, Weruaga E, Alonso JR, Arenzana FJ, Aijón J, Arévalo R. 2004.  
534 Cholinergic elements in the zebrafish central nervous system: Histochemical and  
535 immunohistochemical analysis. *J. Comp. Neurol.* **474**: 75–107.  
536

- 537 Cullheim S, Kellerth JO, Conradi S. 1977. Evidence for direct synaptic interconnections  
538 between cat spinal alpha-motoneurons via the recurrent axon collaterals: a morphological study  
539 using intracellular injection of horseradish peroxidase. *Brain Res.* **132**: 1–10.  
540
- 541 Deardorff AS, Romer SH, Sonner PM, Fyffe REW. 2014. Swimming against the tide:  
542 investigations of the C-bouton synapse. *Front Neural Circuits* **8**: 106.  
543
- 544 Eccles JC, Fatt P, Koketsu K. 1954. Cholinergic and inhibitory synapses in a pathway from  
545 motor-axon collaterals to motoneurons. *J. Physiol. (Lond.)* **126**: 524–562.  
546
- 547 Felder CC. 1995. Muscarinic acetylcholine receptors: signal transduction through multiple  
548 effectors. *Faseb J.* **9**: 619–625.  
549
- 550 Finkel E, Etlin A, Cherniak M, Mor Y, Lev-Tov A, Anglister L. 2014. Neuroanatomical basis  
551 for cholinergic modulation of locomotor networks by sacral relay neurons with ascending  
552 lumbar projections. *Journal of Comparative Neurology* **522**: 3437–3455.  
553
- 554 Gabriel JP, Ausborn J, Ampatzis K, Mahmood R, Eklöf-Ljunggren E, Manira El A. 2011.  
555 Principles governing recruitment of motoneurons during swimming in zebrafish. *Nature*  
556 *Publishing Group* **14**: 93–99.  
557
- 558 González, A., López, J.M., Sánchez-Camacho, C., Marín, O., 2002. Localization of choline  
559 acetyltransferase (ChAT) immunoreactivity in the brain of a caecilian amphibian, *Dermophis*  
560 *mexicanus* (Amphibia: Gymnophiona). *J. Comp. Neurol.* **448**: 249–267.  
561 doi:10.1002/cne.10233  
562
- 563 Goulding M. 2009. Circuits controlling vertebrate locomotion: moving in a new direction. *Nat.*  
564 *Rev. Neurosci.* **10**: 507–518.  
565
- 566 Grillner S, Jessell TM. 2009. Measured motion: searching for simplicity in spinal locomotor  
567 networks. *Curr. Opin. Neurobiol.* **19**: 572–586.  
568
- 569 Grillner SS. 2003. The motor infrastructure: from ion channels to neuronal networks. *Nat. Rev.*  
570 *Neurosci.* **4**: 573–586.



571  
572 Hassall CJ, Stanford SC, Burnstock G, Buckley NJ. 1993. Co-expression of four muscarinic  
573 receptor genes by the intrinsic neurons of the rat and guinea-pig heart. *Neuroscience* **56**: 1041–  
574 1048.  
575  
576 Herron LR, Miles GB. 2012. Gender-specific perturbations in modulatory inputs to  
577 motoneurons in a mouse model of amyotrophic lateral sclerosis. *Neuroscience* **226**: 313–323.  
578  
579 Höglund AU, Baghdoyan HA. 1997. M2, M3 and M4, but not M1, muscarinic receptor  
580 subtypes are present in rat spinal cord. *J. Pharmacol. Exp. Ther.* **281**: 470–477.  
581  
582 Hornby TG, McDonagh JC, Reinking RM, Stuart DG. 2002. Effects of excitatory modulation  
583 on intrinsic properties of turtle motoneurons. *J. Neurophysiol.* **88**: 86–97.  
584  
585 Hosey MM. 1992. Diversity of structure, signaling and regulation within the family of  
586 muscarinic cholinergic receptors. *Faseb J.* **6**: 845–852.  
587  
588 Huang A, Noga BR, Carr PA, Fedirchuk B, Jordan LM. 2000. Spinal cholinergic neurons  
589 activated during locomotion: localization and electrophysiological characterization. *J.*  
590 *Neurophysiol.* **83**: 3537–3547.  
591  
592 Hulme EC, Birdsall NJ, Buckley NJ. 1990. Muscarinic receptor subtypes. *Annu. Rev.*  
593 *Pharmacol. Toxicol.* **30**: 633–673.  
594  
595 Ichiyama RM, Broman J, Roy RR, Zhong H, Edgerton VR, Havton LA. 2011. Locomotor  
596 training maintains normal inhibitory influence on both alpha- and gamma-motoneurons after  
597 neonatal spinal cord transection. *Journal of Neuroscience* **31**: 26–33.  
598  
599 Ireland MF, Funk GD, Bellingham MC. 2012. Muscarinic acetylcholine receptors enhance  
600 neonatal mouse hypoglossal motoneuron excitability in vitro. *J. Appl. Physiol.* **113**:1024–1039.  
601  
602 Jordan L, McVagh JR, Noga BR, Cabaj AM, Majczyński H, Sławińska U, Provencher J,  
603 Leblond H, Rossignol S. 2014. Cholinergic mechanisms in spinal locomotion-potential target  
604 for rehabilitation approaches. *Front Neural Circuits* **8**: 132.

605  
606 Kiehn O. 2006. Locomotor circuits in the mammalian spinal cord. *Annu. Rev. Neurosci.* **29**:  
607 279–306.  
608  
609 Kurihara T, Suzuki H, Yanagisawa M, Yoshioka K. 1993. Muscarinic excitatory and inhibitory  
610 mechanisms involved in afferent fibre-evoked depolarization of motoneurons in the neonatal  
611 rat spinal cord. *Br. J. Pharmacol.* **110**: 61–70.  
612  
613 Miles GB, Sillar KT. 2011. Neuromodulation of vertebrate locomotor control networks.  
614 *Physiology (Bethesda)* **26**: 393–411.  
615  
616 Miles GB, Hartley R, Todd AJ, Brownstone RM. 2007. Spinal cholinergic interneurons regulate  
617 the excitability of motoneurons during locomotion. *Proc. Natl. Acad. Sci. U.S.A.* **104**: 2448–  
618 2453.  
619  
620 Mueller T, Vernier P, Wullimann MF. 2004. The adult central nervous cholinergic system of a  
621 neurogenetic model animal, the zebrafish *Danio rerio*. *Brain Res.* **1011**: 156–169.  
622  
623 Murakami Y, Matsumoto K, Ohta H, Watanabe H. 1996. Effects of oxotremorine and  
624 pilocarpine on striatal acetylcholine release as studied by brain dialysis in anesthetized rats.  
625 *Gen. Pharmacol.* **27**: 833–836.  
626  
627 Palstra AP, Tudorache C, Rovira M, Brittijn SA, Burgerhout E, van den Thillart GEEJM,  
628 Spaink HP, Planas JV. 2010. Establishing zebrafish as a novel exercise model: swimming  
629 economy, swimming-enhanced growth and muscle growth marker gene expression. *PLoS ONE*  
630 **5**, e14483.  
631  
632 Pullen AH, Athanasiou D. 2009. Increase in presynaptic territory of C-terminals on lumbar  
633 motoneurons of G93A SOD1 mice during disease progression. *Eur. J. Neurosci.* **29**: 551–561.  
634  
635 Quinlan KA, Buchanan JT. 2008. Cellular and synaptic actions of acetylcholine in the lamprey  
636 spinal cord. *J. Neurophysiol.* **100**: 1020–1031. doi:10.1152/jn.01157.2007  
637

- 638 Satou C, Kimura Y, Higashijima S-I. 2012. Generation of multiple classes of V0 neurons in  
639 zebrafish spinal cord: progenitor heterogeneity and temporal control of neuronal diversity.  
640 *Journal of Neuroscience* **32**: 1771–1783.
- 641
- 642 Saxena S, Roselli F, Singh K, Leptien K, Julien J-P, Gros-Louis F, Caroni P. 2013.  
643 Neuroprotection through excitability and mTOR required in ALS motoneurons to delay disease  
644 and extend survival. *Neuron* **80**: 80–96.
- 645
- 646 Skup M, Gajewska-Wozniak O, Grygielewicz P, Mankovskaya T, Czarkowska-Bauch J. 2012.  
647 Different effects of spinalization and locomotor training of spinal animals on cholinergic  
648 innervation of the soleus and tibialis anterior motoneurons. *Eur. J. Neurosci.* **36**: 2679–2688.
- 649
- 650 Song J, Ampatzis K, Björnfors ER, Manira El A. 2016. Motor neurons control locomotor circuit  
651 function retrogradely via gap junctions. *Nature* **529**: 399–402.
- 652
- 653 Stil A, Drapeau P. 2016. Neuronal labeling patterns in the spinal cord of adult transgenic  
654 Zebrafish. *Dev Neurobiol* **76**: 642–660.
- 655
- 656 Thiriet G, Kempf J, Ebel A. 1992. Distribution of cholinergic neurons in the chick spinal cord  
657 during embryonic development. Comparison of ChAT immunocytochemistry with AChE  
658 histochemistry. *Int. J. Dev. Neurosci.* **10**: 459–466.
- 659
- 660 Uemura O, Okada Y, Ando H, Guedj M, Higashijima S-I, Shimazaki T, Chino N, Okano H,  
661 Okamoto H. 2005. Comparative functional genomics revealed conservation and diversification  
662 of three enhancers of the *isll* gene for motor and sensory neuron-specific expression. *Dev. Biol.*  
663 **278**: 587–606.
- 664
- 665 Welton J, Stewart W, Kerr R, Maxwell DJ. 1999. Differential expression of the muscarinic m2  
666 acetylcholine receptor by small and large motoneurons of the rat spinal cord. *Brain Res.* **817**:  
667 215–219.
- 668
- 669 Wullimann MF, Rupp B, Reichert H. 1996. Neuroanatomy of the zebrafish brain: a topological  
670 atlas. Basel: Birkhaeuser Verlag.

- 671 Zagoraiou L, Akay T, Martin JF, Brownstone RM, Jessell TM, Miles GB. 2009. A cluster of  
672 cholinergic premotor interneurons modulates mouse locomotor activity. *Neuron* **64**: 645–662.  
673
- 674 Zhang H-M, Li D-P, Chen S-R, Pan H-L. 2005. M2, M3, and M4 receptor subtypes contribute  
675 to muscarinic potentiation of GABAergic inputs to spinal dorsal horn neurons. *J. Pharmacol.*  
676 *Exp. Ther.* **313**: 697–704.

677 **Figures**

678

679

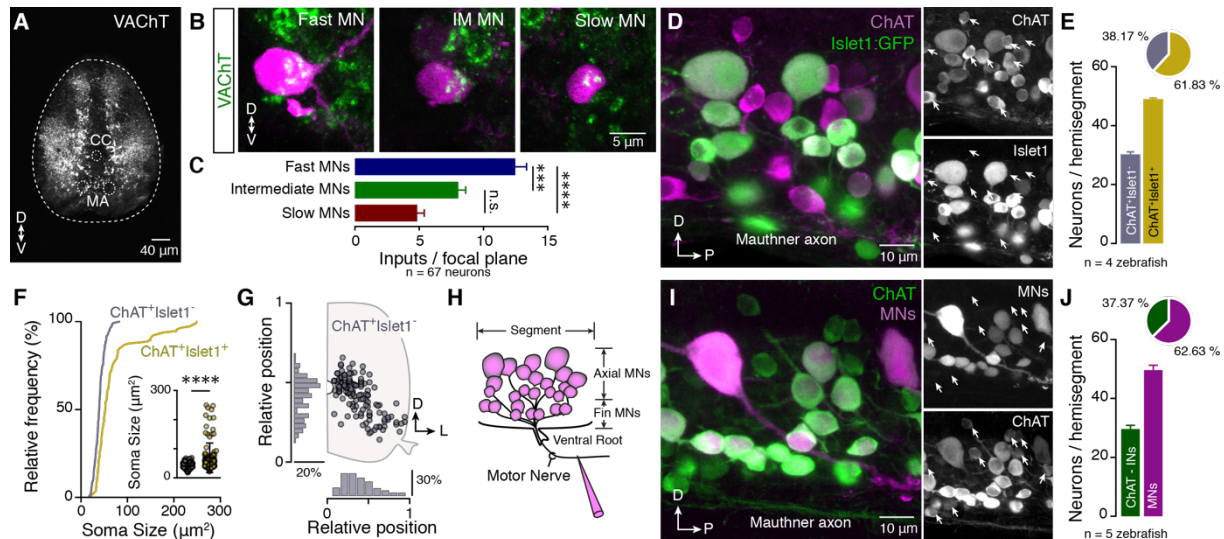

680

681 **Figure 1.** Organization of spinal cholinergic system. (A) Distribution of cholinergic terminals within  
 682 the adult zebrafish spinal cord. (B) Single optical sections show the cholinergic synapses onto different  
 683 types of motoneurons. (C) Cholinergic (ACh) input is different between motoneuron (MN) classes, ( $n_{\text{slow}}$   
 684 = 10,  $n_{\text{interm}} = 27$ ,  $n_{\text{fast}} = 30$  neurons;  $n = 5$  zebrafish). (D) Whole mount spinal cord image shows that  
 685 cholinergic interneurons  $\text{ChAT}^+\text{Islet1}^-$  exist in adult zebrafish. Arrows indicate the  $\text{ChAT}^+\text{Islet1}^-$  neurons  
 686 (Cholinergic interneurons). (E) Quantification of the adult zebrafish cholinergic neurons, in *Islet1:GFP*  
 687 line, per spinal cord hemisegment ( $n = 4$  zebrafish). (F) Cholinergic interneurons ( $\text{ChAT}^+\text{Islet1}^-$ ) have  
 688 smaller soma sizes compared to motoneurons. (G) Distribution pattern of cholinergic interneurons  
 689 ( $\text{ChAT}^+\text{Islet1}^-$ ) within the adult zebrafish spinal cord. (H) Drawing showing the methodological  
 690 approach to backfill all the motoneurons (axial and fin) exiting the spinal cord through the ventral root  
 691 by injecting a retrograde tracer (Dextran). (I) Whole mount spinal cord immunohistochemistry reveals  
 692 that a fraction of  $\text{ChAT}^+$  neurons are not backfilled motoneurons. Arrows indicate  $\text{ChAT}^+\text{MN}^-$  neurons  
 693 (Cholinergic interneurons;  $n = 5$  zebrafish). (J) Quantification of the adult zebrafish cholinergic neurons,  
 694 per spinal cord hemisegment ( $n = 5$  zebrafish), reveals similar number of cholinergic interneurons as in  
 695 the *Islet1:GFP* line. CC, central canal; D, dorsal; L, lateral; MA, Mauthner axon; P, posterior; V, ventral.  
 696 Data are presented as mean  $\pm$  SEM; \*\*\* $p < 0.001$ ; \*\*\*\* $p < 0.0001$ ; n.s., non-significant.

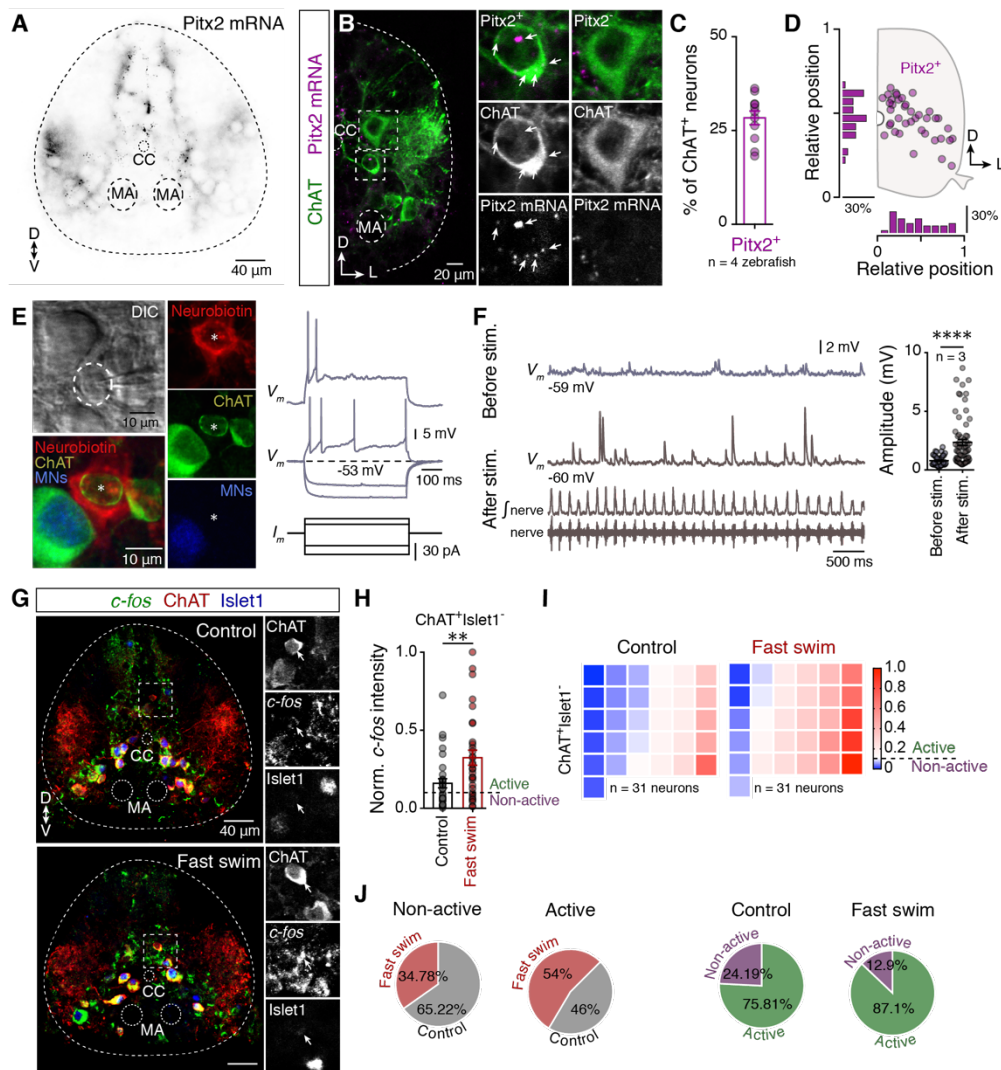

697

698 **Figure 2.** Cholinergic interneurons are homologues to mammalian V0c interneurons and they are  
 699 recruited at high speed locomotion. (A) Localization of *Pitx2* mRNA in adult zebrafish spinal cord. (B)  
 700 Cholinergic *Pitx2*<sup>+</sup> and *Pitx2* neurons found in adult zebrafish spinal cord. Arrows indicate the location  
 701 of mRNA in the cholinergic neuron. (C) Quantification (%) of cholinergic neurons that are *Pitx2*<sup>+</sup> (n =  
 702 4 zebrafish). (D) Distribution pattern of cholinergic *Pitx2*<sup>+</sup> interneurons within the adult zebrafish spinal  
 703 cord. (E) Whole cell patch clamp recording from identified neuron that filled with neurobiotin. Post-  
 704 hoc evaluation of the patched neuron that is cholinergic (ChAT<sup>+</sup>) and not motoneuron (MN). Firing  
 705 behavior of a representative cholinergic interneuron upon steps of somatic current injections. The  
 706 asterisk denotes the neurobiotin filled patched neuron. (F) Increasing number and amplitude of post-  
 707 synaptic responses during fictive locomotion, as indicated from the recording of motor nerve activity  
 708 (lower trace and rectified trace) after electrical stimulation of descending axons to initiate locomotion  
 709 (n = 3 neurons). (G) Microphotographs showing that *c-fos* immunoreactivity increases after prolonged  
 710 (2h) forced fast swimming (80% of the Ucrit) in the cholinergic interneurons (ChAT<sup>+</sup>Islet1<sup>+</sup>). (H)  
 711 Quantification of normalized *c-fos* intensity in cholinergic interneurons (ChAT<sup>+</sup>Islet1<sup>+</sup>). The threshold  
 712 of activity was considered to be 0.11. (I) Heat map displaying the normalized *c-fos* intensity of each  
 713 individual cholinergic interneuron (n<sub>control</sub> = 31 neurons, n<sub>fast swim</sub> = 31 neurons). (J) Proportions of active  
 714 and non-active cholinergic interneurons (ChAT<sup>+</sup>Islet1<sup>+</sup>) between control and after forced fast swimming  
 715 based on the normalized *c-fos* intensity. CC, central canal; D, dorsal; L, lateral; MA, Mauthner axon; P,  
 716 posterior; V, ventral. Data are presented as mean ± SEM; \*\*p < 0.01; \*\*\*\*p < 0.0001.

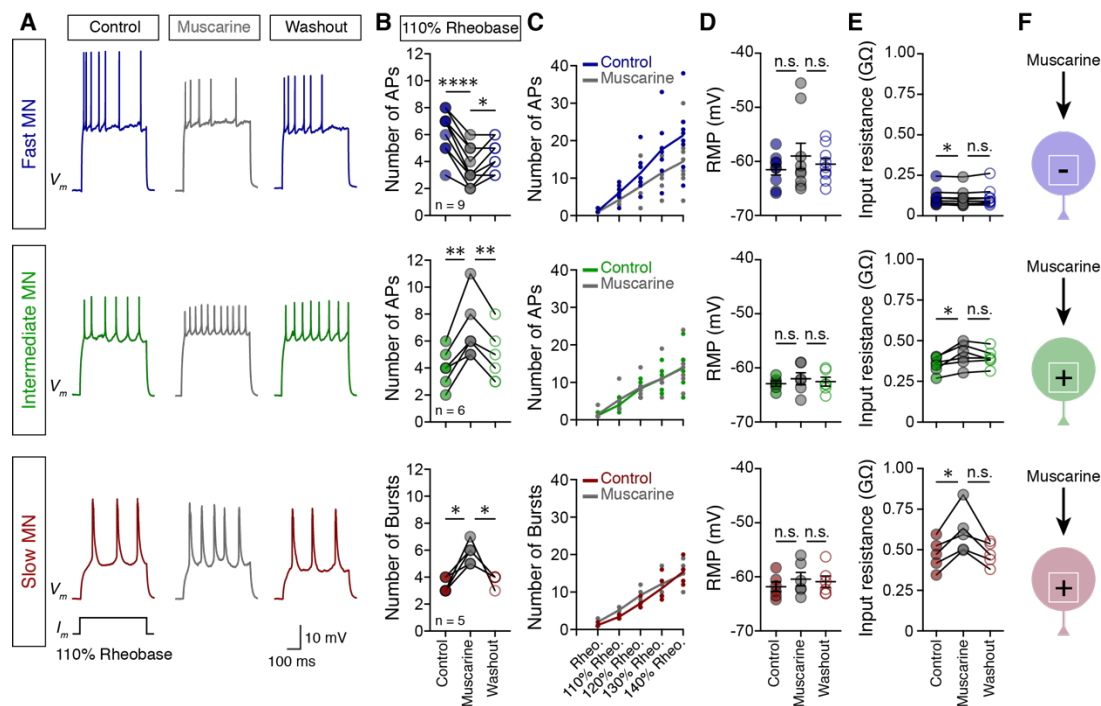

717  
718

719 **Figure 3.** Muscarinic receptors differentially alter motoneuron excitability. (A) Representative traces of  
720 motoneuron (MN) firing in responses to 110% of rheobase somatic current injection, before (colored  
721 traces) after bath application of muscarine (15  $\mu$ M; gray traces) and followed by washout (colored  
722 traces). (B) In the presence of muscarine the fast motoneurons significantly reduce the number of action  
723 potentials (APs) in response to 110% of rheobase current injection, while both the intermediate and the  
724 slow motoneurons increase their firing rate. During washout, the motoneurons partially recover ( $n_{\text{fast}} =$   
725 9 neurons,  $n_{\text{intermediate}} = 6$  neurons,  $n_{\text{slow}} = 5$  neurons). (C) Relation of the number of action potentials  
726 (APs) or bursts of APs to current (increments of 10% increase from rheobase) in absence (colored line)  
727 and presence of muscarine (gray line). (D) During the application of muscarine (gray circles) and after  
728 washout (open colored circles) there is no significant change in the resting membrane potential of the  
729 motoneurons. (E) Bath application of muscarine alters the input resistance of all motoneuron types. The  
730 input resistance was decreased in the fast motoneurons and increased in the intermediate and slow  
731 motoneurons. (F) Overview of the change in excitability of different types of MNs in response to  
732 muscarine. The sign represents the alteration of the MN excitability (+ = increase, - = decrease). Data  
733 are presented as mean  $\pm$  SEM; \* $p < 0.05$ ; \*\* $p < 0.01$ ; \*\*\* $p < 0.0001$ ; n.s., non-significant.

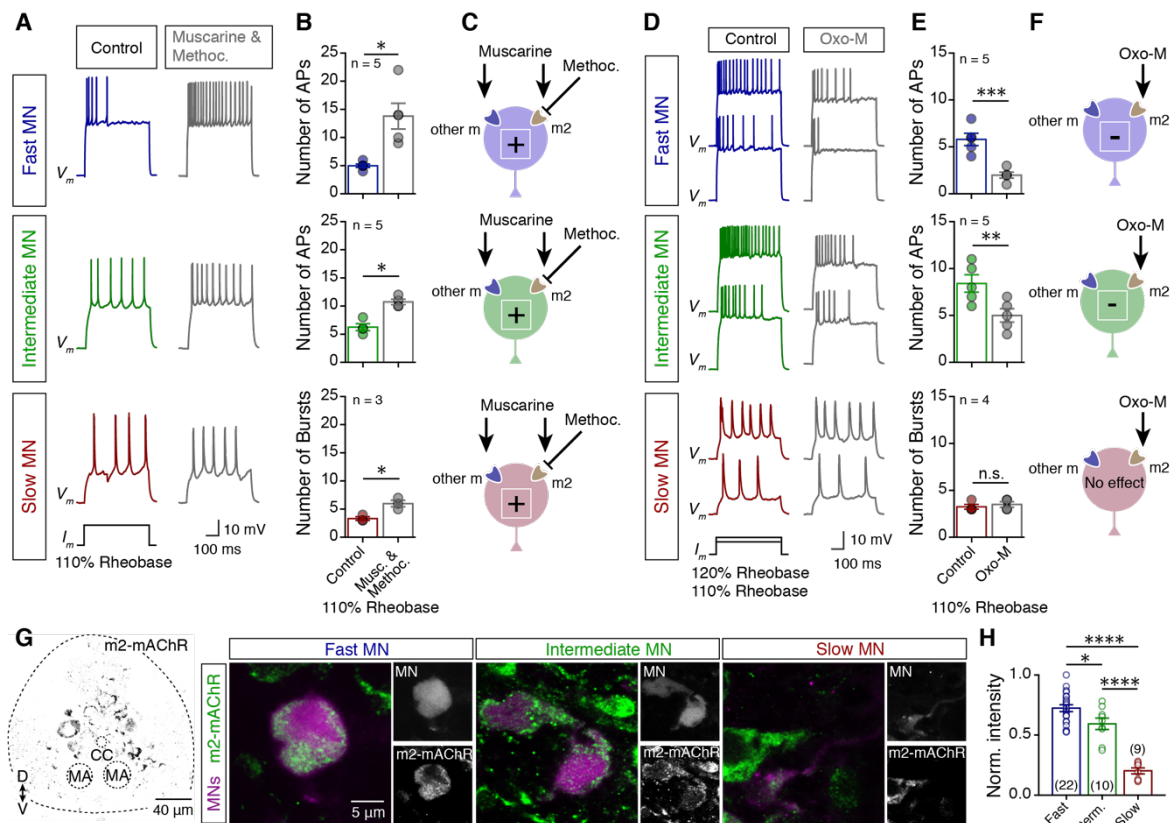

734

735

736 **Figure 4.** Motoneurons possess different muscarinic receptor subtypes. (A) Traces of motoneuron (MN)  
 737 firing in response to 110% of rheobase current injection, before (colored traces) and after bath  
 738 application of a mixture of muscarine (15 $\mu$ M) and methoctramine (10 $\mu$ M; gray traces). (B-C) Co-  
 739 application of muscarine and methoctramine produce hyperexcitability in all MN pools ( $n_{fast} = 5$  neurons,  
 740  $n_{intermediate} = 5$  neurons,  $n_{slow} = 3$  neurons), derived from the antagonistic effect on m2-mAChRs. (D)  
 741 Representative traces of motoneuron (MN) firing in response to 110% and 120% of rheobase current  
 742 injections, before (colored traces) and after bath application of oxotremorine-M (Oxo-M; 20  $\mu$ M; gray  
 743 traces) which preferentially activates the m2-mAChRs. (E-F) In the presence of oxotremorine-M,  
 744 excitability decreases in the fast and intermediate motoneurons, whereas the slow motoneurons do not  
 745 change their firing rate in response to 110% of rheobase current injection ( $n_{fast} = 5$  neurons,  $n_{intermediate} =$   
 746  $n_{slow} = 4$  neurons). (G) Distribution pattern of m2-mAChRs in relation to different  
 747 motoneuron types. A combination of retrograde labeling of different motoneuron pools with  
 748 immunostaining for m2-mAChRs reveals that the fast motoneurons exhibit a vast number of m2  
 749 receptors compared to other motoneuron types (intermediate and slow). Slow motoneurons were found  
 750 to be weakly labeled. The sign represents the excitability alteration of the MN (+ = increase, - =  
 751 decrease). Data are presented as mean  $\pm$  SEM; \* $p < 0.05$ ; \*\* $p < 0.01$ ; \*\*\* $p < 0.001$ ; \*\*\*\* $p < 0.0001$ ;  
 752 n.s., non-significant.



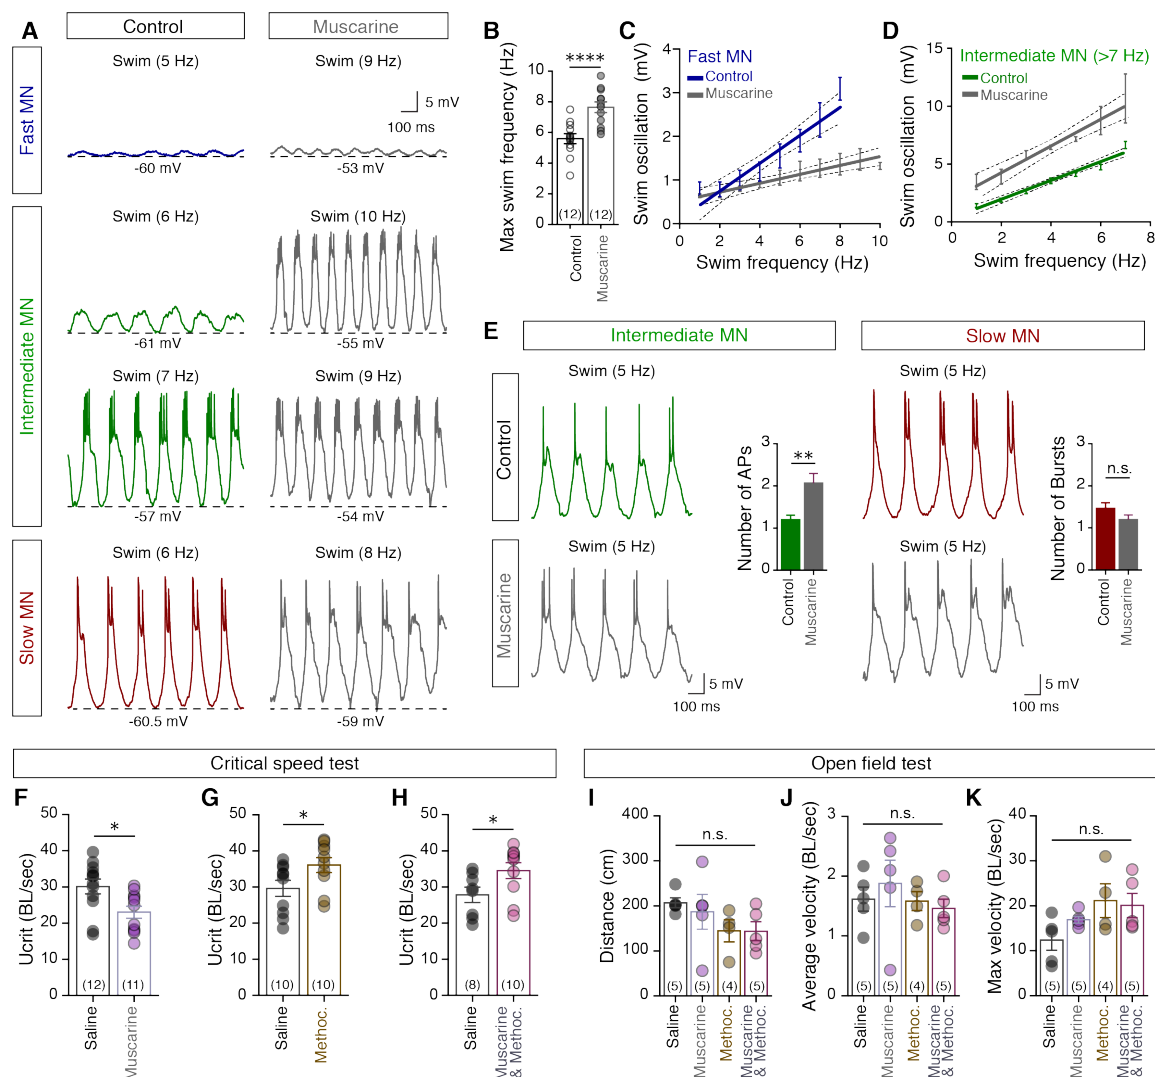

753

754

755 **Figure 5.** Activation of motoneuron muscarinic receptors controls fast locomotion. (A-B) During fictive  
756 locomotion, motoneurons display membrane potential oscillations. The highest swimming frequency  
757 increases in the presence of muscarine (15  $\mu$ M; gray traces) during fictive locomotion (*ex vivo*  
758 experiments). Dashed line indicates the membrane potential of the lower part of the oscillations. (C)  
759 Averaged slopes of the membrane potential oscillations in relation to different swimming frequencies  
760 of fast motoneurons in the absence (blue line), or presence (gray line) of muscarine. The data are  
761 presented as interpolation curve (middle line  $\pm$  SEM) and 95% confidence band (outer dashed lines). (D)  
762 Slopes showing the increasing amplitude of the membrane potential oscillations of the intermediate  
763 motoneurons recruited above 7 Hz, in relation to the swimming frequency, before and after the  
764 application of muscarine. After muscarine (gray line) the amplitude of the membrane oscillations was  
765 significant increased ( $F = 856.6$   $p < 0.0001$ ), in comparison to the control (green line). The data are  
766 presented as interpolation curve (middle line  $\pm$  SEM) and 95% confidence band (outer dashed lines).  
767 (E) During 5 Hz fictive locomotion, in the absence (colored trace) or presence (gray trace) of muscarine,  
768 the number of discharges of intermediate motoneurons increased, while slow motoneurons did not  
769 display any changes in the number of bursts of action potentials. (F-H) Intraperitoneal administration  
770 of muscarine reduces the  $U_{crit}$  (BL =  $1.84 \pm 0.11$  cm;  $n = 23$  zebrafish), while methoctramine increased  
771 the maximum swimming speed (BL =  $1.68 \pm 0.1$  cm;  $n = 20$  zebrafish). Co-administration of muscarine  
772 and methoctramine increased the maximum obtained swimming speed (BL =  $1.71 \pm 0.12$  cm;  $n = 18$   
773 zebrafish). (I-K) *In vivo* monitoring of adult zebrafish locomotor behavior. Muscarine and/or  
774 methoctramine administration was not found to affect the distance traveled, the average velocity and the  
775 maximum velocity of the studied animals ( $n = 19$  zebrafish). The data were normalized to body lengths

776 (BL) / sec. Data are presented as mean  $\pm$  SEM; \* $p < 0.05$ ; \*\* $p < 0.01$ ; \*\*\*\* $p < 0.0001$ ; n.s., non-  
777 significant.

778

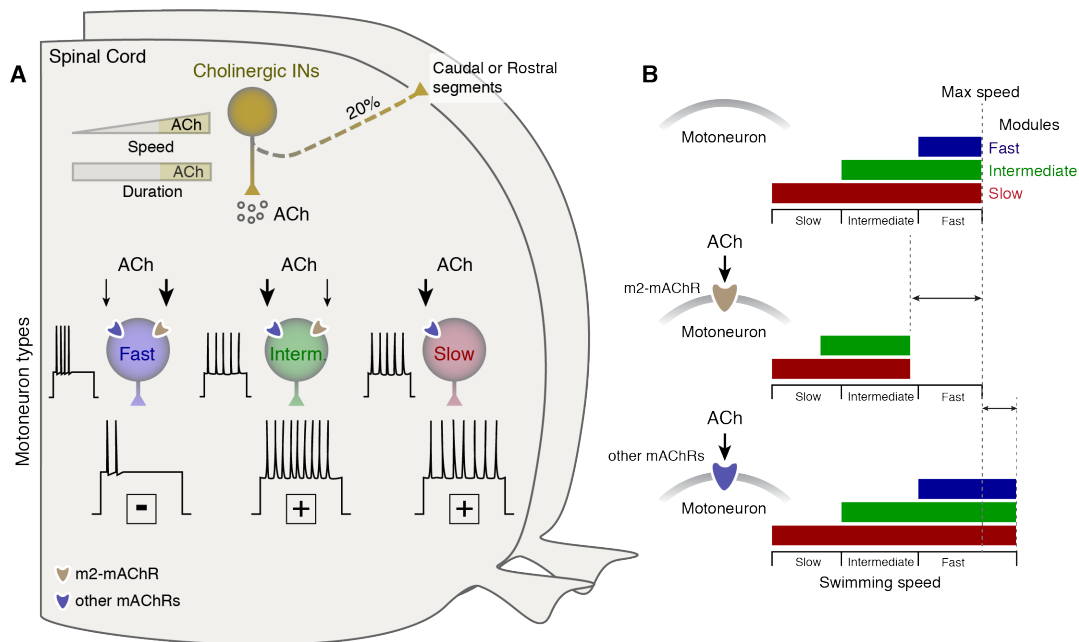

779

780

781 **Figure 6.** Differential organization of cholinergic input to MNs permits changes of the operational range  
782 of locomotor circuit. (A) Acetylcholine release (after prolonged fast swimming) from spinal cholinergic  
783 interneurons affects the excitability of different types of motoneurons in a mAChR dependent manner.  
784 Our results clearly demonstrate that acetylcholine can only increase slow motoneuron excitability,  
785 whereas the intermediate and fast motoneurons can alter their excitability through the activation of the  
786 different mAChRs that they possess. (B) This configuration allows the animals to adjust the recruitment  
787 of the locomotor microcircuit modules and alter the operational range of these networks.

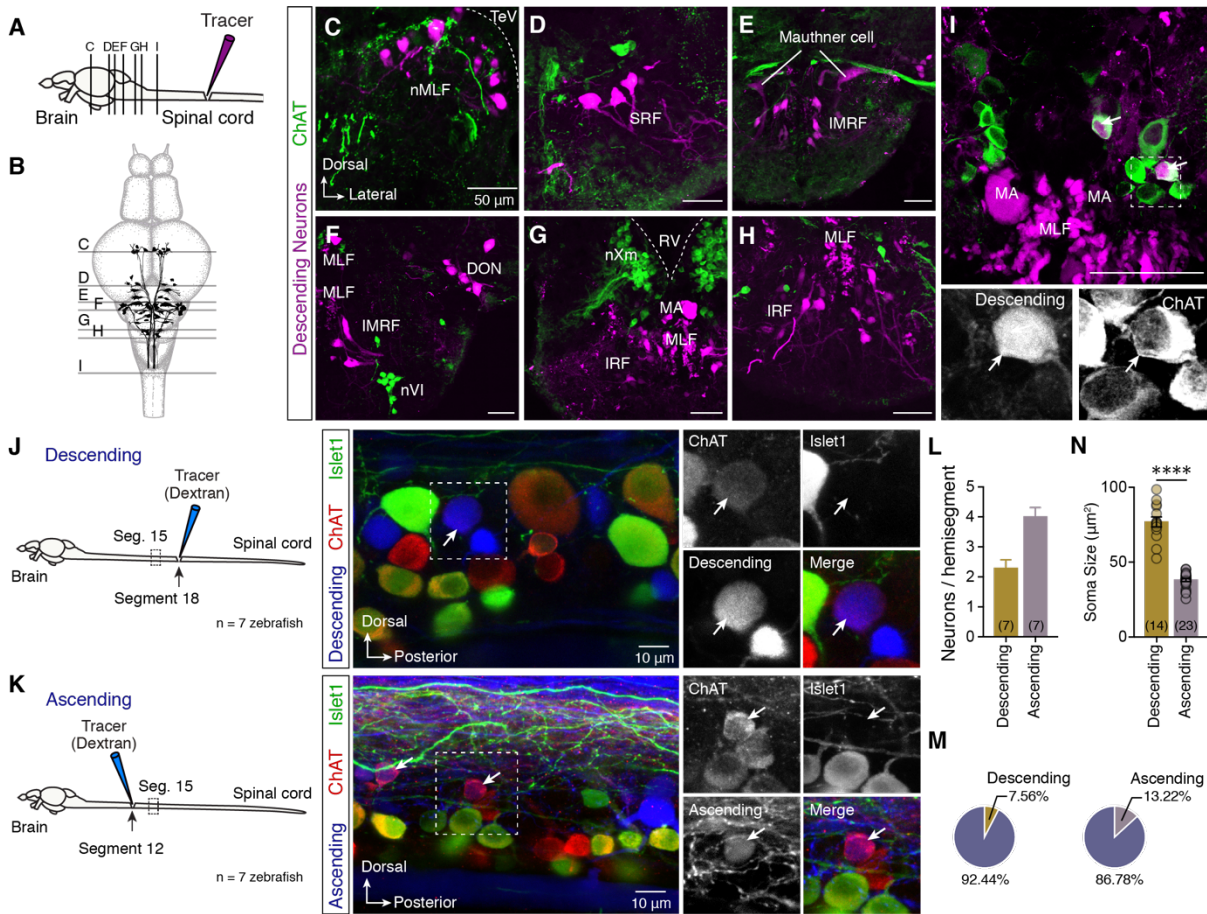

**Supplementary file 1.** All the brain neurons descending to spinal cord are not cholinergic. **(A-B)** Injection of methylrhodamine dextran in the spinal cord retrogradely labels all the descending supra-spinal neurons (N = 8 zebrafish brains). Schematic representation of the distribution of adult zebrafish brain descending neurons with the level of sections that correspond to the following images in C-I. **(C-H)** Confocal images show that none of the descending labeled neuron is ChAT<sup>+</sup> in all studied brain areas. **(I)** Few descending neurons (n = 4 neurons out of 8 brains) were found to be ChAT<sup>+</sup> in the initial part of the spinal cord. Arrows indicate the double labeled neurons. **(J)** Injection of a retrograde dextran tracer in spinal segment 18 reveals the descending interneurons located in spinal cord segment 15. Few descending neurons that are cholinergic (ChAT<sup>+</sup>) and not motoneurons (Islet1<sup>-</sup>) were found in the spinal hemisegment of adult zebrafish. Arrow indicates cholinergic descending interneuron. **(K)** Injection of dextran retrograde tracer in spinal segment 12 reveals the ascending interneurons in spinal cord segment 15. Arrows indicate a small number of retrograde traced neurons that are cholinergic interneurons (ChAT<sup>+</sup> Islet1<sup>-</sup>). **(L)** Analysis of the number of the cholinergic interneurons that possess a descending (2.28  $\pm$  0.28 neurons / hemisegment; n = 7 zebrafish) or an ascending (4  $\pm$  0.3 neurons / hemisegment; n = 7 zebrafish) axon. **(M)** Percentage of the descending and ascending cholinergic interneurons per hemisegment of spinal cord. **(N)** The descending and ascending cholinergic interneurons have non-overlapping soma sizes (t = 13.4, p < 0.0001, n = 37 neurons), suggesting that different populations of cholinergic interneurons are ascending or descending in adult zebrafish spinal cord. DON, descending octaval nucleus; IMRF, intermediate reticular formation; IRF, inferior reticular formation; MA, Mauthner axon; MLF, medial longitudinal fascicle; nMLF, nucleus of the medial longitudinal fascicle; nVI, abducens nucleus; nXm, vagal motor nucleus; RV, rhombencephalic ventricle; SRF, superior reticular formation; TeV, tectal ventricle. Data are presented as mean  $\pm$  SEM; \*\*\*\*p < 0.0001.

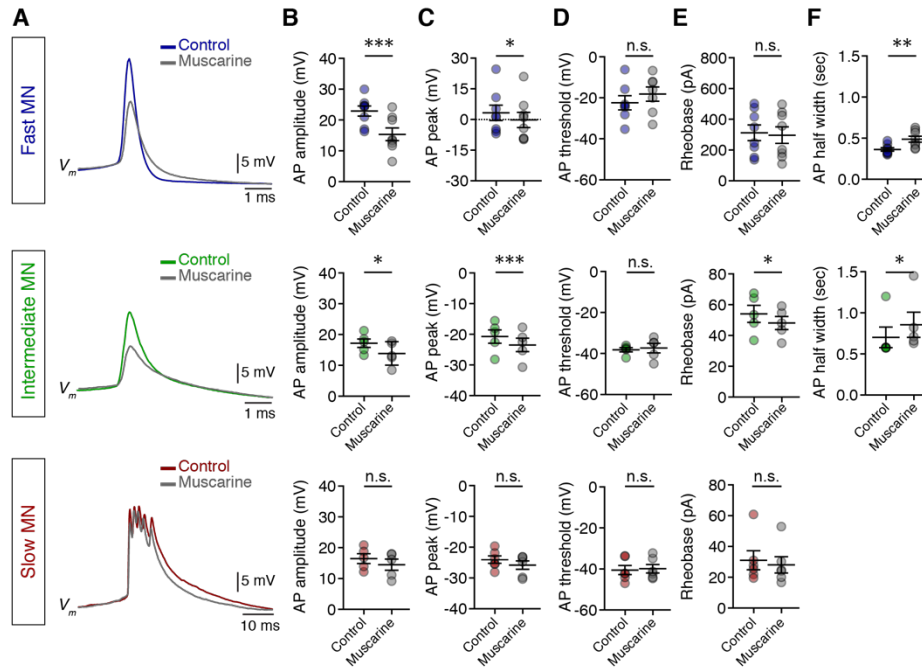

**Supplementary file 2.** Changes in MN intrinsic biophysical properties after the bath application of muscarine. **(A)** Superimposed representative examples of the first action potential (AP) in fast and intermediate motoneurons and first burst of action potentials (APs) of slow motoneurons before (colored traces) and after (gray traces) muscarine. **(B)** The AP amplitude was significantly reduced by muscarine in intermediate ( $t = 4.33$ ,  $p = 0.0123$ ,  $n = 5$ ) and fast motoneurons ( $t = 5.66$ ,  $p = 0.0008$ ,  $n = 8$ ). **(C)** Following the reduction of AP amplitude also the AP peak was found to be hyperpolarized (Fast MNs:  $t = 2.44$ ,  $p = 0.044$ ,  $n = 8$ ; intermediate MNs:  $t = 14.64$ ,  $p = 0.0001$ ). **(D)** Muscarine application was found not to affect the AP threshold. **(E)** Rheobase, the minimum current injection that generates an AP, was hyperpolarized in intermediate motoneurons ( $t = 4.24$ ,  $p = 0.013$ ,  $n = 5$ ). **(F)** The half-width duration of the AP was significantly increased by muscarine in motoneurons firing single APs (intermediate MNs:  $t = 3.79$ ,  $p = 0.019$ ,  $n = 5$ ; fast-MNs:  $t = 4.9$ ,  $p = 0.0017$ ,  $n = 8$ ). Student's paired  $t$  test. Data are presented as mean  $\pm$  SEM; \* $p < 0.05$ ; \*\* $p < 0.01$ ; \*\*\* $p < 0.001$ ; n.s., non-significant.

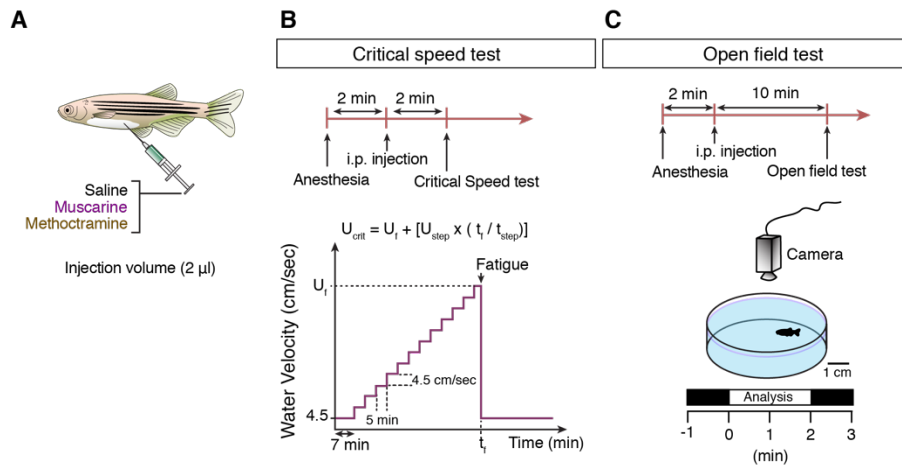

**Supplementary file 3.** Experimental design to investigate the effect of mAChRs during *in vivo* locomotion. **(A)** Intraperitoneal administration of saline, muscarine and/or methoctramine in anesthetized adult zebrafish before the *in vivo* tests. **(B)** The critical speed test protocol. **(C)** Protocol for *in vivo* monitoring of adult zebrafish locomotor behavior.
